# Increased Blood Glucose and Insulin, Body Size, and Incident Colorectal Cancer

Robert E. Schoen, Catherine M. Tangen, Lewis H. Kuller, Gregory L. Burke, Mary Cushman, Russell P. Tracy, Adrian Dobs, Peter J. Savage

**Background:** Abdominal obesity—an elevated level of visceral adipose tissue—has been linked to colorectal cancer. Furthermore, elevated levels of visceral adipose tissue have been associated with hyperinsulinemia, and insulin is a growth factor in the colon. We assessed whether waist circumference, a surrogate measure of visceral adipose tissue, and metabolic parameters associated with visceral adipose tissue were related to colorectal cancer. **Methods:** In the Cardiovascular Health Study cohort, we examined the relationship of baseline measurements of body size, glucose, insulin, and lipoproteins to incident colorectal cancer. All *P* values are two-sided. **Results:** Among 5849 participants, 102 incident cases of colorectal cancer were identified. Individuals in the highest quartile of fasting glucose had a nearly twofold increased risk of colorectal cancer (relative risk [RR] = 1.8; 95% confidence interval [CI] = 1.0–3.1), and the linear trend RR (LT RR = 1.2; 95% CI = 1.0–1.5) for fasting glucose level was statistically significant (*P* = .02). Glucose and insulin levels 2 hours after oral glucose challenge also exhibited statistically significant associations with colorectal cancer (2-hour glucose levels: RR = 2.4 [95% CI = 1.2–4.7]/LT RR = 1.3 [95% CI = 1.0–1.6; *P* = .02]; 2-hour insulin levels: RR = 2.0 [95% CI = 1.0–3.8]/LT RR = 1.2 [95% CI = 1.0–1.5; *P* = .04]). Analysis of fasting insulin levels suggested a threshold effect, with values above the median associated with colorectal cancer (RR = 1.6; 95% CI = 1.1–2.4; *P* = .02). Higher levels of waist circumference were also statistically significantly associated with colorectal cancer (RR = 1.9; 95% CI = 1.1–3.3; *P* = .02). **Conclusions:** These data provide, to our knowledge, the first direct evidence of an association between elevated visceral adipose tissue level, its associated metabolic effects, and colo-

rectal cancer. [J Natl Cancer Inst 1999; 91:1147–54]

Many studies (1–3) have demonstrated a relationship between body mass index (BMI) and increased risk for colorectal cancer, especially in men. Additional data (4) suggest that adipose tissue distribution may be an important mediating factor in the association between BMI and colorectal cancer. In the Health Professionals Follow-up Cohort Study of more than 31 000 men (4), waist-to-hip ratio, a surrogate measure of intra-abdominal fat or visceral adipose tissue (VAT), demonstrated a strong relationship with the subsequent development of colorectal cancer (relative risk [RR] = 3.4 for those in the highest versus the lowest quintile). An elevated waist-to-hip ratio was also associated with incident colorectal adenomas of at least 1 cm in size, which are considered at high risk for subsequent development of colorectal cancer, but not with small adenomas, which are less likely to progress (5).

A biologic rationale for the association of abdominal obesity with colorectal cancer has emerged as an elevated VAT level has been shown to be associated with hyperinsulinemia (6–8), and insulin and insulin-like growth factors (IGFs) are mitogens for the colonic mucosa and for colon carcinoma cell lines (9–11). These findings have spawned an “insulin hypothesis” of colorectal cancer pathogenesis (9).

Risk factors associated with colorectal cancer can be integrated into a causative model centering on the relationship between VAT, insulin, and colorectal cancer. For example, epidemiologic evidence supports a protective role for physical activity against colorectal cancer (4,12–15). Physical activity can result in preferential loss of VAT relative to subcutaneous adipose tissue (16), with a concomitant improvement in the metabolic profile (17–19). The effect of physical activity on VAT may be a means by which physical activity mediates decreased risk for colorectal cancer. Similarly, hypertriglyceridemia has been linked to colorectal cancer risk (20), and increased amounts of VAT, because of its more active lipolytic responsiveness, result in elevated triglyceride levels and increased free fatty acid production (7).

We hypothesized that waist circumference, as a surrogate measure of VAT, and the metabolic parameters associated with

VAT, including insulin, glucose, triglycerides, and high-density lipoprotein (HDL), would be associated with incident colorectal cancer. To our knowledge, no previous studies have prospectively measured these parameters for their relationship to incident colorectal cancer.

## METHODS

### Population

The Cardiovascular Health Study (CHS) is an observational, population-based, cohort study of risk factors for coronary heart disease and stroke in individuals 65 years old and older (21). The design, rationale, and recruitment of subjects in the CHS have been detailed elsewhere (21,22). The CHS cohort was recruited in two phases from four communities: Forsyth County, NC; Sacramento County, CA; Washington County, MD; and Allegheny County, PA. After recruitment of a first cohort (*n* = 5201; 5.3% members of minority groups) in 1989–1990, a second cohort with 687 minority subjects (97.8% African-American) was enrolled in 1992–1993. Community samples were identified from the Medicare enrollment lists of the Health Care Financing Administration (HCFA), Baltimore, MD.

### Testing

Subjects underwent comprehensive psychosocial, medical, and physical assessments with the use of questionnaires, blood measurements, and noninvasive testing that included electrocardiography, carotid ultrasonography, and echocardiography (21). Dietary intake was assessed by use of a modified version of the food-frequency questionnaire of Block et al. (23). Physical activity was determined with the modified Minnesota Leisure Time Activities (24) and Paffenbarger et al. (25) questionnaires, by use of a weighted average of regular and leisure activities.

Anthropometric measurements were performed in a standardized fashion and included waist and hip circumferences. BMI was calculated as weight in kilograms/height in meters squared. Fasting venipuncture was performed with aliquots of plasma and

*Affiliations of authors:* R. E. Schoen (Departments of Medicine and Epidemiology), L. H. Kuller (Department of Epidemiology), University of Pittsburgh, PA; C. M. Tangen, Department of Biostatistics, University of Washington, Seattle; G. L. Burke, Department of Public Health and Sciences, Wake Forest University School of Medicine, Winston-Salem, NC; M. Cushman (Departments of Medicine and Pathology), R. P. Tracy (Departments of Medicine, Pathology, and Biochemistry), University of Vermont, Burlington; A. Dobs, Department of Medicine, The Johns Hopkins University, Baltimore, MD; P. J. Savage, National Heart, Lung, and Blood Institute, Bethesda, MD.

*Correspondence to:* Robert E. Schoen, M.D., M.P.H., Division of Gastroenterology and Hepatology, Mezzanine Level, C Wing, PUH, 200 Lothrop St., Pittsburgh, PA 15213-2582.

See “Notes” following “References.”

© Oxford University Press

serum frozen at  $-70^{\circ}\text{C}$  and shipped to a central blood analysis laboratory. Serum insulin was measured by solid-phase radioimmunoassay with the use of serum-based standards (Diagnostic Products Corp., Los Angeles, CA). In the initial cohort, all participants, except diabetics treated with insulin or oral hypoglycemic agents, drank a 75-g oral glucose load and underwent 2-hour post-challenge measurement of glucose and insulin levels. Impaired glucose tolerance was defined as a fasting glucose level of less than 140 mg/dL (7.8 mmol/L) and a 2-hour glucose value between 140 and 199 mg/dL. Diabetes was defined as a fasting glucose level of greater than 140 mg/dL (7.8 mmol/L) or a 2-hour glucose value of at least 200 mg/dL (11.1 mmol/L), in accordance with World Health Organization guidelines (26), or a medical history of diabetes. Glucose and insulin measurements at 2 hours after glucose challenge and food-frequency questionnaires were not administered to the second cohort at their baseline examination.

Lipid analyses were performed according to the standards of the Centers for Disease Control and Prevention. Low-density lipoprotein (LDL) cholesterol was calculated according to the equation of Friedewald et al. (27). Blind replicate blood samples were drawn from 5% of the participants, and reliability and reproducibility estimates have been published (28).

## End Points

The participants were followed semiannually by alternating phone calls and clinic visits and underwent a second extensive clinical examination 3 years after enrollment. Between contacts, participants and their physicians were encouraged to report hospitalizations and major illnesses. Periodic searches of the HCFA Medicare utilization (MEDPAR) files were performed to identify hospitalizations not otherwise ascertained, but these accounted for only 7% of hospital ascertainment (29).

Although the CHS was designed to investigate cardiovascular end points, the abstraction of medical records on all hospitalizations for all diagnoses allowed assessments of incident colorectal cancer that led to hospitalization. ICD-9 (International Classification of Diseases, 9<sup>th</sup> revision) codes for colon (153.0–153.4 and 153.6–153.9) and rectal (154.0, 154.1, and 154.8) cancers were ascertained for each case of colorectal cancer. Incident cancers that did not lead to hospitalization were not available for study. Events received at the CHS coordinating center as of June 30, 1996, were used in these analyses.

## Analysis and Statistical Methods

To evaluate the association of baseline characteristics with incident colorectal cancer, categorical and continuous variables were included in univariate Cox models (Table 1). Continuous variables were categorized into quartiles, separately by sex, and Cox regression models adjusted for age, sex, and physical activity were fit for the sample as a whole and by sex. Hazard ratios for time-to-cancer diagnosis were estimated for each of the upper three quartiles (Q2, Q3, and Q4) of each covariate examined relative to Q1. A test for linear trend was performed to assess for a monotonically increasing or decreasing relationship to incident colorectal cancer. If the *P* value was  $>.10$  for the linear test, this was considered supportive of a linear relationship, and a

**Table 1.** Baseline characteristics of subjects by incident colorectal cancer\*

| Covariate                                      | Colorectal cancer<br>(n = 102) | No colorectal cancer<br>(n = 5747) | Hazard ratio | <i>P</i> † |
|------------------------------------------------|--------------------------------|------------------------------------|--------------|------------|
| Sex, % male                                    | 57.8                           | 42.1                               | 2.0          | <.001      |
| Race, % black                                  | 12.8                           | 15.7                               | 1.2          | .52        |
| Mean age, y (SD)                               | 73.9 (5.5)                     | 72.8 (5.6)                         | 1.2‡         | .01        |
| % income $\geq$ \$25 000/y                     | 29.5                           | 38.4                               | 0.6          | .04        |
| % married                                      | 62.8                           | 66.2                               | 0.8          | .25        |
| % current smoker                               | 13.0                           | 12.0                               | 1.1          | .69        |
| No. of alcoholic drinks consumed per wk§ (SD)  | 3.6 (8.9)                      | 2.4 (6.2)                          | 1.1          | .23        |
| % current aspirin use                          | 31.4                           | 33.8                               | 0.9          | .64        |
| Total kilocalories of physical activity (SD)§  | 1458 (1759)                    | 1727 (2044)                        | 1.0          | .24        |
| Time to walk 15 feet in seconds (SD)§          | 5.7 (1.6)                      | 5.8 (2.3)                          | 1.1          | .85        |
| Mean % of diet that is fat¶ (SD)               | 34.5 (6.7)                     | 33.8 (7.2)                         | 1.0          | .26        |
| Mean No. of vegetable servings per wk¶, # (SD) | 9.2 (5.4)                      | 9.1 (5.6)                          | 1.0          | .95        |
| Mean No. of fruit servings per wk¶, # (SD)     | 10.1 (7.4)                     | 9.5 (6.9)                          | 1.2          | .43        |

\*SD = standard deviation.

†All *P* values are two-sided; if  $<.05$ , *P* values are considered statistically significant.

‡Relative risk for an increase of 5 years.

§Square root transformation was used in proportional hazards model.

||Defined as aspirin used  $\geq 3$  days in the previous 2 weeks.

¶Available for the majority of the first cohort only.

#Modeled as “ $>7$  servings per week” relative to “ $\leq 7$  servings per week.”

linear model was fit. If a linear relationship did not fit the data, appropriate categorization of the quartiles for general trends was performed. All *P* values were two-sided and were considered statistically significant for a *P* value less than .05. The proportional hazards assumption was tested and was found to be reasonable for each model, with the possible exception of the model for triglycerides.

## RESULTS

### Baseline Characteristics

Over a median follow-up of 77 months (79 months for cohort 1 [range, 73–84 months] and 38 months for cohort 2 [range, 36–43 months]) among 5849 participants (excluding 39 individuals with self-reported diagnosis of colorectal cancer prior to entry in the cohort), 102 incident cases of colorectal cancer were identified. Ninety-three of the cases were diagnosed in cohort 1, and nine were diagnosed in cohort 2. Characteristics of the subjects with incident colorectal cancer compared with those without are presented in Table 1. Subjects with colorectal cancer were more likely to be male, 57.8% versus 42.1% ( $P<.001$ ); to be older, 73.9 versus 72.8 years ( $P = .01$ ); and to have lower yearly household incomes, 29.5% of the cancer patients having an income of at least \$25 000/year versus 38.4% of the subjects without colorectal cancer ( $P = .04$ ). Patients with colorectal cancer did not differ from those without colorectal cancer in terms of smoking, current use of aspirin, alcoholic drinks consumed per week, percent of fat calories in diet, or mean number of veg-

etable or fruit servings per week (Table 1). Median follow-up time was 78.9 months among case patients and 77.4 months among non-case subjects.

Although mean physical activity levels were lower in case patients (Table 1), this did not reach statistical significance. Individuals in the highest quartile of physical activity (measured as total kilocalories of physical activity) compared with those in the lowest quartile were at decreased risk for incident colorectal cancer (RR = 0.8; 95% confidence interval [CI] = 0.4–1.4), but none of the quartiles of physical activity were statistically significantly different from quartile 1 ( $P = .08$ ; 3 *df*). Regardless, physical activity was adjusted for in the subsequent analysis.

### Associations With Incident Colorectal Cancer

The relationships between baseline glucose, insulin, anthropometric measures, lipid levels, and incident colorectal cancer in men and women in Cox proportional hazards models adjusted for age, sex, and physical activity are presented in Table 2. For each of the covariates, the sex-specific range of values of the quartiles is listed.

Individuals in the highest quartile of fasting glucose were at 80% higher risk of developing incident colorectal cancer compared with those in the lowest quartile (RR = 1.8; 95% CI = 1.0–3.1;  $P = .04$ ). A monotonic increase in risk by quartile was demonstrated (linear trend [LT] RR = 1.2; 95% CI = 1.0–1.5;  $P =$

**Table 2.** Relative risk of incident colorectal cancer in the Cardiovascular Health Study\*

| Factor                                     | Q1             | Q2         | Q3          | Q4          | Linear model†      |
|--------------------------------------------|----------------|------------|-------------|-------------|--------------------|
| Fasting glucose, mg/dL                     |                |            |             |             |                    |
| Range                                      |                |            |             |             |                    |
| Men                                        | 61–96          | 97–103     | 104–115     | 116–448     |                    |
| Women                                      | 53–93          | 94–99      | 100–110     | 111–657     |                    |
| No. of case patients/total No. of subjects | 22/1591        | 18/1352    | 29/1433     | 32/1393     |                    |
| Relative risk                              | 1.0 (referent) | 0.9        | 1.4         | 1.8         | 1.2                |
| 95% CI                                     |                | 0.5–1.8    | 0.8–2.4     | 1.0–3.1     | 1.0–1.5<br>P = .02 |
| 2-h glucose, ‡,§ mg/dL                     |                |            |             |             |                    |
| Range                                      |                |            |             |             |                    |
| Men                                        | 41–108         | 109–134    | 135–170     | 171–660     |                    |
| Women                                      | 38–110         | 111–137    | 138–173     | 174–691     |                    |
| No. of case patients/total No. of subjects | 12/1155        | 22/1162    | 19/1126     | 29/1130     |                    |
| Relative risk                              | 1.0 (referent) | 1.8        | 1.6         | 2.4         | 1.3                |
| 95% CI                                     |                | 0.9–3.6    | 0.8–3.3     | 1.2–4.7     | 1.0–1.6<br>P = .02 |
| Fasting insulin, IU/mL                     |                |            |             |             |                    |
| Range                                      |                |            |             |             |                    |
| Men                                        | 4–10           | 11–13      | 14–18       | 19–400      |                    |
| Women                                      | 3–9            | 10–13      | 14–18       | 19–400      |                    |
| No. of case patients/total No. of subjects | 29/1661        | 17/1538    | 29/1232     | 26/1297     |                    |
| Relative risk                              | 1.0 (referent) | 0.6        | 1.4         | 1.2         | NA                 |
| 95% CI                                     |                | 0.3–1.1    | 0.8–2.3     | 0.7–2.1     |                    |
| 2-h insulin ‡,§                            |                |            |             |             |                    |
| Range                                      |                |            |             |             |                    |
| Men                                        | 5–38           | 39–65      | 66–101      | 102–400     |                    |
| Women                                      | 5–45           | 46–70      | 71–109      | 110–500     |                    |
| No. of case patients/total No. of subjects | 14/1163        | 21/1139    | 21/1094     | 27/1117     |                    |
| Relative risk                              | 1.0 (referent) | 1.5        | 1.6         | 2.0         | 1.2                |
| 95% CI                                     |                | 0.8–2.9    | 0.8–3.1     | 1.0–3.8     | 1.0–1.5<br>P = .04 |
| Waist circumference, cm                    |                |            |             |             |                    |
| Range                                      |                |            |             |             |                    |
| Men                                        | 69–91          | 91.1–97    | 97.1–104    | 104.1–145.5 |                    |
| Women                                      | 32.5–82        | 82.1–91.5  | 91.6–101.1  | 101.2–167   |                    |
| No. of case patients/total No. of subjects | 16/1517        | 31/1411    | 21/1461     | 30/1422     |                    |
| Relative risk                              | 1.0 (referent) | 2.2        | 1.4         | 2.2         | NA                 |
| 95% CI                                     |                | 1.2–4.0    | 0.7–2.7     | 1.2–4.1     |                    |
| Body mass index¶                           |                |            |             |             |                    |
| Range                                      |                |            |             |             |                    |
| Men                                        | 15.6–23.9      | 23.91–26.1 | 26.11–28.5  | 28.51–46.2  |                    |
| Women                                      | 14.6–23.2      | 23.21–26.1 | 26.11–29.6  | 29.61–58.8  |                    |
| No. of case patients/total No. of subjects | 22/1456        | 25/1458    | 26/1460     | 27/1456     |                    |
| Relative risk                              | 1.0 (referent) | 1.2        | 1.2         | 1.4         | 1.1                |
| 95% CI                                     |                | 0.7–2.1    | 0.7–2.2     | 0.8–2.5     | 0.9–1.3<br>P = .26 |
| Waist-to-hip ratio                         |                |            |             |             |                    |
| Range                                      |                |            |             |             |                    |
| Men                                        | 0.61–0.93      | 0.931–0.97 | 0.971–1.00  | 1.01–2.33   |                    |
| Women                                      | 0.61–0.83      | 0.831–0.90 | 0.91–0.96   | 0.961–2.06  |                    |
| No. of case patients/total No. of subjects | 14/1454        | 34/1445    | 16/1482     | 34/1427     |                    |
| Relative risk                              | 1.0 (referent) | 2.5        | 1.2         | 2.6         | NA                 |
| 95% CI                                     |                | 1.3–4.6    | 0.6–2.4     | 1.4–4.8     |                    |
| High-density lipoprotein, mg/dL            |                |            |             |             |                    |
| Range                                      |                |            |             |             |                    |
| Men                                        | 18–39          | 40–46      | 47–54       | 55–125      |                    |
| Women                                      | 15–48          | 49–57      | 58–68       | 69–149      |                    |
| No. of case patients/total No. of subjects | 29/1608        | 34/1424    | 22/1333     | 16/1419     |                    |
| Relative risk                              | 1.0 (referent) | 1.3        | 0.9         | 0.6         | 0.9                |
| 95% CI                                     |                | 0.8–2.2    | 0.5–1.6     | 0.3–1.2     | 0.7–1.0<br>P = .09 |
| Low-density lipoprotein, mg/dL             |                |            |             |             |                    |
| Range                                      |                |            |             |             |                    |
| Men                                        | 26.8–100.8     | 101.0–122  | 122.8–143.8 | 144–336.8   |                    |
| Women                                      | 24.8–109.8     | 110–132    | 132.8–157.8 | 158–314.8   |                    |
| No. of case patients/total No. of subjects | 35/1447        | 26/1416    | 23/1467     | 16/1386     |                    |
| Relative risk                              | 1.0 (referent) | 0.8        | 0.6         | 0.5         | 0.8                |
| 95% CI                                     |                | 0.5–1.3    | 0.4–1.1     | 0.3–0.9     | 0.7–0.9<br>P = .01 |

(Table continues)



**Table 2 (continued).** Relative risk of incident colorectal cancer in the Cardiovascular Health Study\*

| Factor                                | Q1             | Q2      | Q3      | Q4       | Linear model†             |
|---------------------------------------|----------------|---------|---------|----------|---------------------------|
| Triglycerides, mg/dL                  |                |         |         |          |                           |
| Range                                 |                |         |         |          |                           |
| Men                                   | 35–90          | 91–118  | 119–162 | 163–1323 |                           |
| Women                                 | 24–93          | 94–121  | 122–166 | 167–1216 |                           |
| No. of patients/total No. of subjects | 20/1466        | 28/1438 | 26/1469 | 27/1420  |                           |
| Relative risk                         | 1.0 (referent) | 1.4     | 1.3     | 1.4      | 1.1                       |
| 95% CI                                |                | 0.8–2.5 | 0.7–2.3 | 0.8–2.5  | 0.9–1.3<br><i>P</i> = .34 |

\*Cox proportional hazard models adjusted for age, sex, and physical activity. Q = quartile; RR = relative risk; 95% CI = 95% confidence interval.

†All *P* values are two-sided; if <.05, they are considered statistically significant.

‡First cohort only.

§Does not include diabetics.

||NA = not applicable because a linear relationship was not indicated by the data.

¶Body mass index = weight in kg/height in m<sup>2</sup>.

.02), with a 20% increase in risk for each successive quartile. Glucose and insulin levels 2 hours after oral glucose challenge were also significantly related to colorectal cancer. For 2-hour glucose levels (Q4 versus Q1), there was a 2.4-fold increased risk (95% CI = 1.2–4.7); for 2-hour insulin levels (Q4 versus Q1), the risk was increased 2.0-fold (95% CI = 1.0–3.8). Both 2-hour glucose (LT RR = 1.3; 95% CI = 1.0–1.6; *P* = .02) and 2-hour insulin (LT RR = 1.2; 95% CI = 1.0–1.5; *P* = .04) were linearly related to increased risk (Table 2), with a 30% and 20% increased risk, respectively, for each successive quartile. Quartile analysis of fasting insulin levels suggested a threshold effect, with an adjusted RR of 1.6 (95% CI = 1.1–2.4; *P* = .02) for insulin levels above versus below the median (Q1 + Q2 versus Q3 + Q4) (Table 2).

BMI was not statistically significantly associated with colorectal cancer incidence, but waist circumference was (RR = 2.2; 95% CI = 1.2–4.1; *P* = .01) for Q4 compared with Q1. A linear relationship across quartiles was not evident, but risk appeared to rise at Q2. A model comparing participants in Q2 through Q4 with those in Q1 showed that the adjusted RR for a higher level of waist circumference was 1.9 (95% CI = 1.1–3.3; *P* = .02).

Repeating these analyses with adjustment for diabetes or by exclusion of diabetics did not change the RR estimates.

Triglyceride and HDL levels were not statistically significantly associated with colorectal cancer (Table 2). Higher levels of LDL (Q4 versus Q1) were strongly linked to lower risk of colorectal cancer (RR = 0.5; 95% CI = 0.3–0.9), and a linear decreasing relationship was observed (LT RR = 0.8; 95% CI = 0.7–0.9; *P* = .01).

An exploratory subset analysis of risk by sex was performed. There were 59 colorectal cancers among 2476 men and 43 cancers among 3373 women. The results suggested that the relationship between 2-hour insulin and waist circumference and colorectal cancer is largely accounted for by the results in men.

The relationship between those with glucose intolerance or diabetes (defined by baseline blood glucose, medication history, and the results of the oral glucose load) and incident colorectal cancer are presented in Table 3. Neither those with glucose intolerance (RR = 1.5; 95% CI = 0.9–2.4; *P* = .09) nor those classified as diabetic (RR = 1.4; 95% CI = 0.8–2.4; *P* = .20) were at significantly increased risk, nor were there apparent differences by sex (Table 3).

To determine if the results were affected by alterations in covariate levels due to prevalent cancer that had not yet

reached clinical attention, we repeated the analysis, excluding 22 patients who had been diagnosed in the 1st year of follow-up. The point estimates for RR did not change. The mean risk-factor levels by year of diagnosis were also examined. There was no evidence of a temporal pattern to suggest an effect due to subclinical disease (Table 4).

## DISCUSSION

In this prospective cohort study in elderly U.S. men and women, fasting glucose and 2-hour glucose and insulin levels after a glucose challenge were associated with an approximately twofold increased risk for incident colorectal cancer. A threshold effect for fasting insulin was also suggested, with individuals above the median level being at a 60% increased risk for incident colorectal cancer. Increased waist circumference also was as-

**Table 3.** Relationship of diabetes and glucose intolerance to incident colorectal cancer\*

|                                            | Normal         | Glucose intolerant | Diabetic |
|--------------------------------------------|----------------|--------------------|----------|
| Men + women                                |                |                    |          |
| No. of case patients/total No. of subjects | 38/2576        | 32/1425            | 23/1161  |
| Relative risk                              | 1.0 (referent) | 1.5                | 1.4      |
| 95% CI                                     |                | 0.9–2.4            | 0.8–2.4  |
| <i>P</i>                                   |                | .09                | .20      |
| Men only                                   |                |                    |          |
| No. of case patients/total No. of subjects | 21/1085        | 17/604             | 15/531   |
| Relative risk                              | 1.0 (referent) | 1.5                | 1.6      |
| 95% CI                                     |                | 0.8–2.8            | 0.8–3.1  |
| <i>P</i>                                   |                | .24                | .16      |
| Women only                                 |                |                    |          |
| No. of case patients/total No. of subjects | 17/1491        | 15/821             | 8/630    |
| Relative risk                              | 1.0 (referent) | 1.6                | 1.1      |
| 95% CI                                     |                | 0.8–3.1            | 0.5–2.6  |
| <i>P</i>                                   |                | .21                | .82      |

\*First cohort only. All *P* values are two-sided and are considered statistically significant for *P* < .05. 95% CI = 95% confidence interval.

**Table 4.** Mean risk factor levels by year of diagnosis for patients with colorectal cancer

|                                           | Year 1          | Year 2          | Year 3          | Year 4          | Year 5          | Year 6          | Year 7*          |
|-------------------------------------------|-----------------|-----------------|-----------------|-----------------|-----------------|-----------------|------------------|
| No. of case patients†.....                | 22              | 13              | 19              | 16              | 16              | 10              | 6                |
| Risk factor‡                              |                 |                 |                 |                 |                 |                 |                  |
| Fasting glucose                           | 104.4<br>(10.3) | 117.7<br>(41.7) | 125.0<br>(60.5) | 118.6<br>(40.7) | 115.4<br>(27.5) | 122.9<br>(35.5) | 101.8<br>(14.0)  |
| Fasting insulin                           | 12.9<br>(6.0)   | 14.7<br>(7.3)   | 28.5<br>(30.9)  | 15.3<br>(7.1)   | 18.8<br>(11.4)  | 13.1<br>(5.8)   | 15.3<br>(7.6)    |
| Low-density lipoprotein                   | 116.7<br>(32.3) | 127.4<br>(31.5) | 131.6<br>(36.6) | 113.2<br>(34.3) | 130.6<br>(36.5) | 102.3<br>(34.3) | 106.9<br>(18.4)  |
| High-density lipoprotein                  | 48.3<br>(12.4)  | 47.3<br>(12.8)  | 49.3<br>(14.7)  | 49.3<br>(13.2)  | 51.8<br>(9.9)   | 48.5<br>(7.1)   | 43.7<br>(9.3)    |
| Triglycerides                             | 127.3<br>(45.6) | 174.1<br>(86.1) | 147.7<br>(81.4) | 155.8<br>(90.1) | 125.8<br>(43.0) | 130.6<br>(37.5) | 197.2<br>(119.4) |
| Body mass index§                          | 26.1<br>(3.6)   | 28.4<br>(3.6)   | 27.7<br>(6.0)   | 27.4<br>(6.5)   | 26.7<br>(4.2)   | 27.0<br>(3.4)   | 26.7<br>(2.7)    |
| Waist circumference                       | 94.0<br>(9.7)   | 99.7<br>(11.1)  | 100.6<br>(16.2) | 97.7<br>(14.8)  | 97.7<br>(14.6)  | 101.1<br>(8.9)  | 96.1<br>(9.1)    |
| Waist-to-hip ratio                        | 0.94<br>(.08)   | 0.95<br>(.06)   | 0.97<br>(.11)   | 0.93<br>(.07)   | 0.95<br>(.07)   | 0.98<br>(.06)   | 0.96<br>(.09)    |
|                                           | Year 1          | Year 2          | Year 3          | Year 4          | Year 5          | Year 6          | Year 7           |
| No. of case patients (cohort 1 only)..... | 19              | 11              | 15              | 16              | 16              | 10              | 6                |
| Risk factor‡                              |                 |                 |                 |                 |                 |                 |                  |
| 2-h glucose                               | 173.4<br>(42.4) | 155.5<br>(61.9) | 143.4<br>(31.4) | 151.0<br>(66.6) | 152.3<br>(69.3) | 154.4<br>(45.5) | 145.5<br>(38.3)  |
| 2-h insulin                               | 92.9<br>(54.4)  | 77.9<br>(48.7)  | 101.9<br>(72.9) | 80.2<br>(36.6)  | 101.8<br>(97.7) | 71.3<br>(26.3)  | 163.2<br>(139.2) |

\*Year 7 has median follow-up duration for 7 months; hence, the number of cases for this interval is smaller.

†The minority cohort contributes cases for 3 years and 2 months of year 4, since their median follow-up is 38 months.

‡Data are presented as mean (standard deviation).

§Body mass index = weight in kg/height in m<sup>2</sup>.

sociated with an approximately twofold increased risk for colorectal cancer. The level of increased risk observed with these variables is substantial and equals or exceeds that of other recognized risk factors for colorectal cancer, such as having a first-degree relative with colorectal cancer (30) or consuming a high-fat or low-fiber diet (31–34). The demonstration of a relationship between waist circumference and metabolic parameters associated with VAT and colorectal cancer supports a link between VAT and colorectal cancer.

Abdominal obesity has been linked to cardiovascular disease (35–37), diabetes (38,39), and overall mortality (40). Data suggest that abdominal obesity may also be associated with breast (41), colon (4), and prostate (42) neoplasia. While epidemiologic studies have shown an association between waist circumference and waist-to-hip ratio and colorectal cancer (4), to our knowledge this study is the first to demonstrate an association between measures of insulin exposure and colorectal cancer. These data directly support *in vitro* biologic studies that show a growth-promoting effect of insulin on colorectal cancer (9–11).

Our findings of a relationship between fasting glucose and insulin levels as well

as glucose and insulin levels 2 hours after glucose challenge and colorectal cancer are consistent with data linking diabetes to colorectal cancer risk. Recent cohort and case-control studies (43,44), population-based studies of hospital discharges (45), and population-based studies via national cancer registries (46) confirm a 10%–40% increase in colorectal cancer in subjects with diabetes mellitus. While some studies have not shown a statistically significant association between diabetes and colorectal cancer (47–49), small sample size and an inability to account for important covariates may have limited those investigations. A recent report (50) from a prospective cancer mortality study of more than 1 million U.S. citizens confirms an increased risk of colorectal cancer in diabetics, especially in men. Although a significant relationship between glucose intolerance, diabetes, and colorectal cancer was not demonstrated in this study, the point estimates (RR = 1.5 for glucose intolerance; RR = 1.4 for diabetes) support the hypothesis of an increased risk. The inability to show statistical significance may be secondary to a lack of power due to the small number of case subjects and the low level of increased risk.

The increased risk of colorectal cancer observed with higher fasting insulin as well as higher insulin levels 2 hours after glucose challenge in this cohort is consistent with the increased risk of colorectal cancer seen with non-insulin-dependent diabetes because most individuals with this type of diabetes tend to be insulin resistant and to have higher levels of circulating insulin (51). The association with 2-hour stimulated glucose and insulin levels in this elderly population is of interest, because post-prandial glucose and insulin levels rise to higher levels and remain elevated for a longer period in the elderly (52). Some studies (53,54) have shown a relationship between dietary glucose intake and colorectal cancer, but the biologic basis for this relationship is unknown.

It should be emphasized that our results relating measures of insulin, glucose, and waist circumference to colorectal cancer risk were independent of the presence of diabetes. Thus, nondiabetics appear to have an elevated risk of colorectal cancer as their fasting insulin and glucose rise, even if glucose levels do not reach levels defined as consistent with diabetes.

Hyperinsulinemia is thought to be a

consequence of insulin resistance. Although our results suggest an association between insulin and colorectal cancer, it is not known whether the mechanism that renders individuals insulin resistant also attenuates the insulin effect on colorectal cancer.

The hypothesized causative model relating VAT, insulin, and colorectal cancer benefits from integrating a variety of risk factors for colorectal cancer into a coherent scheme. For example, VAT accumulates with increased age (55–57), and this parallels the increased incidence in colorectal cancer that occurs with aging. Men have more VAT than women, even when controlling for BMI (55–58); thus, VAT may explain the stronger association observed in epidemiologic investigations in men between BMI and colorectal cancer (1). Although this study was not adequately powered to investigate the independent associations within each sex, our study is suggestive of a stronger relationship between VAT and colorectal cancer in men than in women. The link between physical activity and colorectal cancer risk can also be accounted for by invoking a role for VAT.

Surprisingly, a strong association between increased LDL levels and decreased risk of colorectal cancer was identified. The explanation for this finding is unclear. There was no relationship between subclinical evidence of atherosclerotic disease, such as carotid artery stenosis, and colorectal cancer (data not shown), although subclinical atherosclerotic disease is associated with increased LDL (59). LDL levels are generally associated with VAT, though not as strongly as triglycerides or as negatively as HDL cholesterol (60). Excluding colorectal cancer diagnosed in the 1st year of observation did not alter the relationship, nor was there a pattern of low LDL levels in the first few years of follow-up to suggest subclinical prevalent disease as the cause of the observed association (Table 4). Further research on this unexpected finding is required.

The link between VAT, as estimated by waist circumference, may be stronger than that observed because waist circumference only approximates VAT. For example, in studies using computerized tomographic measurement as a gold standard assessment of VAT, the VAT value estimated by anthropometric variables, such as sagittal diameter or BMI, varied by as much as a factor of 3 in both

men and women (61). Thus, inaccuracies in the estimation of VAT by using waist circumference as a surrogate measure may attenuate the actual association.

Although these data are consistent, we did not demonstrate, as one might expect, an association between triglyceride levels and colorectal cancer because triglyceride levels increase with increased amounts of VAT. Similarly, although HDL levels, which are inversely related to VAT, were somewhat lower in patients with colorectal cancer, this did not reach statistical significance. The small number of case patients and the limited follow-up in this cohort may have diminished our ability to demonstrate these associations.

IGFs are acknowledged as potentially important mitogens for many types of malignancy (62–64), including colorectal cancer (10,65). The relationship of obesity, and in particular abdominal obesity, to the IGF family of peptides, binding proteins, and receptors is not well established. A recent nested case–control study (65) found a statistically significant association between IGF-1 and colorectal cancer. Several studies (66–69), mostly in children, suggest that obesity is associated with a decrease in IGF-binding protein-1 and an increase in free and bioavailable IGF-1. Future studies to elucidate the relationship of adipose tissue distribution, insulin, and IGF and IGF-binding proteins to colorectal cancer are anticipated.

Several limitations of this investigation should be acknowledged. The results of this inquiry are based on a relatively small number of colorectal cancer cases ( $n = 102$ ). The limited number of end points precludes accurate estimation of risk within subsets, such as by sex. Similarly, some of the statistically significant or inconsistent results may be due to the multiple statistical tests and comparisons performed. Because of the high degree of association between glucose, insulin, and waist circumference, multivariate testing would likely only identify predictors with the least amount of measurement error, not necessarily those that were most biologically influential. As a result, multivariate testing was not employed, and the independent effects of waist circumference, insulin, or glucose on colorectal cancer risk could not be assessed. Secondly, because the CHS was not designed to acquire cancer end points, case ascertainment may be incomplete. For example, early colorectal cancers removed by endoscopic polypectomy that did not

require hospitalization were not counted. Similarly, histologic confirmation of cases was not performed, and the results cannot be analyzed in relation to cancer stage.

In conclusion, prospective data from the CHS show an approximately twofold increased risk of colorectal cancer in individuals with higher levels of fasting glucose and insulin, with higher levels of glucose and insulin 2 hours after oral glucose challenge, and with increased waist circumference. To our knowledge, these data provide the first direct evidence of an association between VAT and its associated metabolic effects and colorectal cancer.

## REFERENCES

- (1) Potter JD, Slattery ML, Bostick RM, Gapstur SM. Colon cancer: a review of the epidemiology. *Epidemiol Rev* 1993;15:499–545.
- (2) Manson JE, Willett WC, Stampfer MJ, Colditz GA, Hunter DJ, Hankinson SE, et al. Body weight and mortality among women. *N Engl J Med* 1995;333:677–85.
- (3) Murphy T, Calle E, Thun M, Rodriguez C, Wingo P, Heath C. Body mass index and fatal colon cancer in a large prospective study [abstract]. *Am J Epidemiol* 1998;147:541.
- (4) Giovannucci E, Ascherio A, Rimm EB, Colditz GA, Stampfer MJ, Willett WC. Physical activity, obesity, and risk for colon cancer and adenoma in men. *Ann Intern Med* 1995;122:327–34.
- (5) Atkin WS, Morson BC, Cuzick J. Long-term risk of colorectal cancer after excision of rectosigmoid adenomas. *N Engl J Med* 1992;326:658–62.
- (6) Kissebah AH, Vydelingum N, Murray R, Evans DJ, Hartz AJ, Kalkhoff RK, et al. Relation of body fat distribution to metabolic complications of obesity. *J Clin Endocrinol Metab* 1982;54:254–60.
- (7) Bjorntorp P. "Portal" adipose tissue as a generator of risk factors for cardiovascular disease and diabetes. *Arteriosclerosis* 1990;10:493–6.
- (8) Krotkiewski M, Bjorntorp P, Sjostrom L, Smith U. Impact of obesity on metabolism in men and women. Importance of regional adipose tissue distribution. *J Clin Invest* 1983;72:1150–62.
- (9) Giovannucci E. Insulin and colon cancer. *Cancer Causes Control* 1995;6:164–79.
- (10) Singh P, Rubin N. Insulinlike growth factors and binding proteins in colon cancer. *Gastroenterology* 1993;105:1218–37.
- (11) Tran TT, Medline A, Bruce WR. Insulin promotion of colon tumors in rats. *Cancer Epidemiol Biomarkers Prev* 1996;5:1013–5.
- (12) Lee IM, Paffenbarger RS Jr, Hsieh C. Physical activity and risk of developing colorectal cancer among college alumni. *J Natl Cancer Inst* 1991;83:1324–9.
- (13) Vena JE, Graham S, Zielezny M, Swanson MK, Barnes RE, Nolan J. Lifetime occupational exercise and colon cancer. *Am J Epidemiol* 1985;122:357–65.



- (14) Garabrant DH, Peters JM, Mack TM, Bernstein L. Job activity and colon cancer risk. *Am J Epidemiol* 1984;119:1005-14.
- (15) Martinez ME, Giovannucci E, Spiegelman D, Hunter DJ, Willett WC, Colditz GA. Leisure-time physical activity, body size, and colon cancer in women. Nurses' Health Study Research Group. *J Natl Cancer Inst* 1997;89:948-55.
- (16) Ross R. Effects of diet- and exercise-induced weight loss on visceral adipose tissue in men and women. *Sports Med* 1997;24:55-64.
- (17) Despres JP, Pouliot MC, Moorjani S, Nadeau A, Tremblay A, Lupien PJ, et al. Loss of abdominal fat and metabolic response to exercise training in obese women. *Am J Physiol* 1991;261:E159-67.
- (18) Fujioka S, Matsuzawa Y, Tokunaga K, Kawamoto T, Kobatake T, Keno Y, et al. Improvement of glucose and lipid metabolism associated with selective reduction of intra-abdominal visceral fat in premenopausal women with visceral fat obesity. *Int J Obes* 1991;15:853-9.
- (19) Zamboni M, Armellini F, Turcato E, Todesco T, Bissoli L, Bergamo-Andreis IA, et al. Effect of weight loss on regional body fat distribution in premenopausal women. *Am J Clin Nutr* 1993;58:29-34.
- (20) McKeown-Eyssen G. Epidemiology of colorectal cancer revisited: are serum triglycerides and/or plasma glucose associated with risk? *Cancer Epidemiol Biomarkers Prev* 1994;3:687-95.
- (21) Fried LP, Borhani NO, Enright P, Furberg CD, Gardin JM, Kronmal RA, et al. The Cardiovascular Health Study: design and rationale. *Ann Epidemiol* 1991;1:263-76.
- (22) Tell GS, Fried LP, Hermanson B, Manolio TA, Newman AB, Borhani NO. Recruitment of adults 65 years and older as participants in the Cardiovascular Health Study. *Ann Epidemiol* 1993;3:358-66.
- (23) Block G, Hartman AM, Dresser CM, Carroll MD, Gannon J, Gardner L. A data-base approach to diet questionnaire design and testing. *Am J Epidemiol* 1986;124:453-69.
- (24) Taylor HL, Jacobs DR Jr, Schucker B, Knudsen J, Leon AS, Debacker G. A questionnaire for the assessment of leisure time physical activities. *J Chronic Dis* 1978;31:741-55.
- (25) Paffenbarger RS Jr, Wing AL, Hyde RT. Physical activity as an index of heart attack risk in college alumni. *Am J Epidemiol* 1978;108:161-75.
- (26) World Health Organization (WHO). Diabetes mellitus: report of a WHO study group. WHO Technical Report Series, No. 727. Geneva (Switzerland): WHO; 1985.
- (27) Friedewald WT, Levy RI, Fredrickson DS. Estimation of the concentration of low-density lipoprotein cholesterol in plasma, without use of the preparative ultracentrifuge. *Clin Chem* 1972;18:499-502.
- (28) Cushman M, Corneli ES, Howard PR, Bovill EG, Tracy RP. Laboratory methods and quality assurance in the Cardiovascular Health Study. *Clin Chem* 1995;41:264-70.
- (29) Ives DG, Fitzpatrick AL, Bild DE, Psaty BM, Kuller LH, Crowley PM, et al. Surveillance and ascertainment of cardiovascular events. The Cardiovascular Health Study. *Ann Epidemiol* 1995;5:278-85.
- (30) Fuchs CS, Giovannucci EL, Colditz GA, Hunter DJ, Speizer FE, Willett WC. A prospective study of family history and the risk of colorectal cancer. *N Engl J Med* 1994;331:1669-74.
- (31) Giovannucci E, Rimm EB, Stampfer MJ, Colditz GA, Ascherio A, Willett WC. Intake of fat, meat, and fiber in relation to risk of colon cancer in men. *Cancer Res* 1994;54:2390-7.
- (32) Willett WC, Stampfer MJ, Colditz GA, Rosner BA, Speizer FE. Relation of meat, fat, and fiber intake to the risk of colon cancer in a prospective study among women. *N Engl J Med* 1990;323:1664-72.
- (33) Howe GR, Aronson KJ, Benito E, Castelletto R, Cornee J, Duffy S, et al. The relationship between dietary fat intake and risk of colorectal cancer: evidence from the combined analysis of 13 case-control studies. *Cancer Causes Control* 1997;8:215-28.
- (34) Trock B, Lanza E, Greenwald P. Dietary fiber, vegetables, and colon cancer: a critical review and meta-analyses of the epidemiologic evidence. *J Natl Cancer Inst* 1990;82:650-61.
- (35) Larsson B, Svardsudd K, Welin L, Wilhelmsen L, Bjorntorp P, Tibblin G. Abdominal adipose tissue distribution, obesity, and risk of cardiovascular disease and death: 13 year follow up of participants in the study of men born in 1913. *Br Med J (Clin Res Ed)* 1984;288:1401-4.
- (36) Lapidus L, Bengtsson C, Larsson B, Pennert K, Rybo E, Sjoström L. Distribution of adipose tissue and risk of cardiovascular disease and death: a 12 year follow up of participants in the population study of women in Gothenburg, Sweden. *Br Med J (Clin Res Ed)* 1984;289:1257-61.
- (37) Prineas RJ, Folsom AR, Kaye SA. Central adiposity and increased risk of coronary artery disease mortality in older women. *Ann Epidemiol* 1993;3:35-41.
- (38) Kaye SA, Folsom AR, Sprafka JM, Prineas RJ, Wallace RB. Increased incidence of diabetes mellitus in relation to abdominal adiposity in older women. *J Clin Epidemiol* 1991;44:329-34.
- (39) Ohlson LO, Larsson B, Svardsudd K, Welin L, Eriksson H, Wilhelmsen L, et al. The influence of body fat distribution on the incidence of diabetes mellitus. 13.5 years of follow-up of the participants in the study of men born in 1913. *Diabetes* 1985;34:1055-8.
- (40) Folsom AR, Kaye SA, Sellers TA, Hong CP, Cerhan JR, Potter JD, et al. Body fat distribution and 5-year risk of death in older women [published erratum appears in JAMA 1993; 269:1254]. *JAMA* 1993;269:483-7.
- (41) Sellers TA, Kushi LH, Potter JD, Kaye SA, Nelson CL, McGovern PG, et al. Effect of family history, body-fat distribution, and reproductive factors on the risk of postmenopausal breast cancer [published erratum appears in N Engl J Med 1992;327:1612]. *N Engl J Med* 1992;326:1323-9.
- (42) Gann PH, Daviglus ML, Dyer AR, Stamler J. Heart rate and prostate cancer mortality: results of a prospective analysis. *Cancer Epidemiol Biomarkers Prev* 1995;4:611-6.
- (43) Hu FB, Manson JE, Liu S, Hunter D, Colditz GA, Michels KB, et al. Prospective study of adult onset diabetes mellitus (type 2) and risk of colorectal cancer in women. *J Natl Cancer Inst* 1999;91:542-7.
- (44) La Vecchia C, Negri E, Decarli A, Franceschi S. Diabetes mellitus and colorectal cancer risk. *Cancer Epidemiol Biomarkers Prev* 1997;6:1007-10.
- (45) Wideroff L, Gridley G, Mellemkjaer L, Chow WH, Linet M, Keehn S, et al. Cancer incidence in a population-based cohort of patients hospitalized with diabetes mellitus in Denmark. *J Natl Cancer Inst* 1997;89:1360-5.
- (46) Weiderpass E, Gridley G, Nyren O, Ekblom A, Persson I, Adami HO. Diabetes mellitus and risk of large bowel cancer [letter]. *J Natl Cancer Inst* 1997;89:660-1.
- (47) Kune GA, Kune S, Watson LF. Colorectal cancer risk, chronic illnesses, operations, and medications: case-control results from the Melbourne Colorectal Cancer Study. *Cancer Res* 1988;48:4399-404.
- (48) O'Mara BA, Byers T, Schoenfeld E. Diabetes mellitus and cancer risk: a multisite case-control study. *J Chronic Dis* 1985;38:435-41.
- (49) Ragozzino M, Melton LJ 3d, Chu CP, Palumbo PJ. Subsequent cancer risk in the incidence cohort of Rochester, Minnesota, residents with diabetes mellitus. *J Chronic Dis* 1982;35:13-9.
- (50) Will JC, Galuska DA, Vinicor F, Calle EE. Colorectal cancer: another complication of diabetes mellitus? *Am J Epidemiol* 1998;147:816-25.
- (51) Meigs JB, Nathan DM, Wilson PW, Cupples LA, Singer DE. Metabolic risk factors worsen continuously across the spectrum of nondiabetic glucose tolerance. The Framingham Offspring Study. *Ann Intern Med* 1998;128:524-33.
- (52) Reaven GM, Chen N, Hollenbeck C, Chen YD. Effect of age on glucose tolerance and glucose uptake in healthy individuals. *J Am Geriatr Soc* 1989;37:735-40.
- (53) Bostick RM, Potter JD, Kushi LH, Sellers TA, Steinmetz KA, McKenzie DR, et al. Sugar, meat, and fat intake, and non-dietary risk factors for colon cancer incidence in Iowa women (United States). *Cancer Causes Control* 1994;5:38-52.
- (54) Slattery ML, Benson J, Berry TD, Duncan D, Edwards SL, Caan BJ, et al. Dietary sugar and colon cancer. *Cancer Epidemiol Biomarkers Prev* 1997;6:677-85.
- (55) Seidell JC, Oosterlee A, Deurenberg P, Hautvast JG, Ruijs JH. Abdominal fat depots measured with computed tomography: effects of degree of obesity, sex, and age. *Eur J Clin Nutr* 1988;42:805-15.
- (56) Baumgartner RN, Heymsfield SB, Roche AF, Bernardino M. Abdominal composition quantified by computed tomography. *Am J Clin Nutr* 1988;48:936-45.
- (57) Enzi G, Gasparo M, Biondetti PR, Fiore D, Semisa M, Zurlo F. Subcutaneous and visceral fat distribution according to sex, age, and overweight, evaluated by computed tomography. *Am J Clin Nutr* 1986;44:739-46.
- (58) Lemieux S, Prud'homme D, Bouchard C, Tremblay A, Despres JP. Sex differences in the relation of visceral adipose tissue accumulation

- to total body fatness. *Am J Clin Nutr* 1993;58:463-7.
- (59) Kuller LH, Borhani NO, Furberg C, Gardin JM, Manolio TA, O'Leary DH, et al. Prevalence of subclinical atherosclerosis and cardiovascular disease and association with risk factors in the Cardiovascular Health Study. *Am J Epidemiol* 1994;139:1164-79.
  - (60) Despres JP, Moorjani S, Lupien PJ, Tremblay A, Nadeau A, Bouchard C. Regional distribution of body fat, plasma lipoproteins, and cardiovascular disease. *Arteriosclerosis* 1990;10:497-511.
  - (61) Schoen RE, Thaete FL, Sankey SS, Weissfeld JL, Kuller LH. Sagittal diameter in comparison with single slice CT as a predictor of total visceral adipose tissue volume. *Int J Obes Relat Metab Disord* 1998;22:338-42.
  - (62) LeRoith D, Baserga R, Helman L, Roberts CT Jr. Insulin-like growth factors and cancer. *Ann Intern Med* 1995;122:54-9.
  - (63) Baserga R. The insulin-like growth factor I receptor: a key to tumor growth? *Cancer Res* 1995;55:249-52.
  - (64) Burroughs KD, Dunn SE, Barrett JC, Taylor JA. Insulin-like growth factor-I: a key regulator of human cancer risk? [editorial]. *J Natl Cancer Inst* 1999;91:579-81.
  - (65) Ma J, Pollak MN, Giovannucci E, Chan JM, Tao Y, Hennekens CH, et al. Prospective study of colorectal cancer risk in men and plasma levels of insulin-like growth factor (IGF)-I and IGF-binding protein-3. *J Natl Cancer Inst* 1999;91:620-5.
  - (66) Travers SH, Labarta JJ, Gargosky SE, Rosenfeld RG, Jeffers BW, Eckel RH. Insulin-like growth factor binding protein-I levels are strongly associated with insulin sensitivity and obesity in early pubertal children. *J Clin Endocrinol Metab* 1998;83:1935-9.
  - (67) Saitoh H, Kamoda T, Nakahara S, Hirano T, Nakamura N. Serum concentrations of insulin, insulin-like growth factor (IGF)-I, IGF binding protein (IGFBP)-1 and -3 and growth hormone binding protein in obese children: fasting IGFBP-1 is suppressed in normoinsulinaemic obese children. *Clin Endocrinol (Oxf)* 1998;48:487-92.
  - (68) Nam SY, Lee EJ, Kim KR, Cha BS, Song YD, Lim SK, et al. Effect of obesity on total and free insulin-like growth factor (IGF)-I, and their relationship to IGF-binding protein (BP)-1, IGFBP-2, IGFBP-3, insulin, and growth hormone. *Int J Obes Relat Metab Disord* 1997;21:355-9.
  - (69) Attia N, Tamborlane WV, Heptulla R, Maggs D, Grozman A, Sherwin RS, et al. The metabolic syndrome and insulin-like growth factor I regulation in adolescent obesity. *J Clin Endocrinol Metab* 1998;83:1467-71.

## NOTES

Supported by Public Health Service (PHS) grant K07CA72561 (to R. E. Schoen) from the National Cancer Institute, National Institutes of Health (NIH), Department of Health and Human Services (DHHS); and by PHS contract N01HC85079 from the National Heart, Lung, and Blood Institute, NIH, DHHS.

We gratefully acknowledge the assistance of Rita Lorraine Borgese in the preparation of the manuscript.

Manuscript received October 27, 1998; revised April 29, 1999; accepted May 10, 1999.
